# Supplementary figures and images for: Are the Newer Carbapenems of Any Value against Tuberculosis
Source: MDPI journal article supplement (doi:10.3390/antibiotics11081070), 2022-08-07

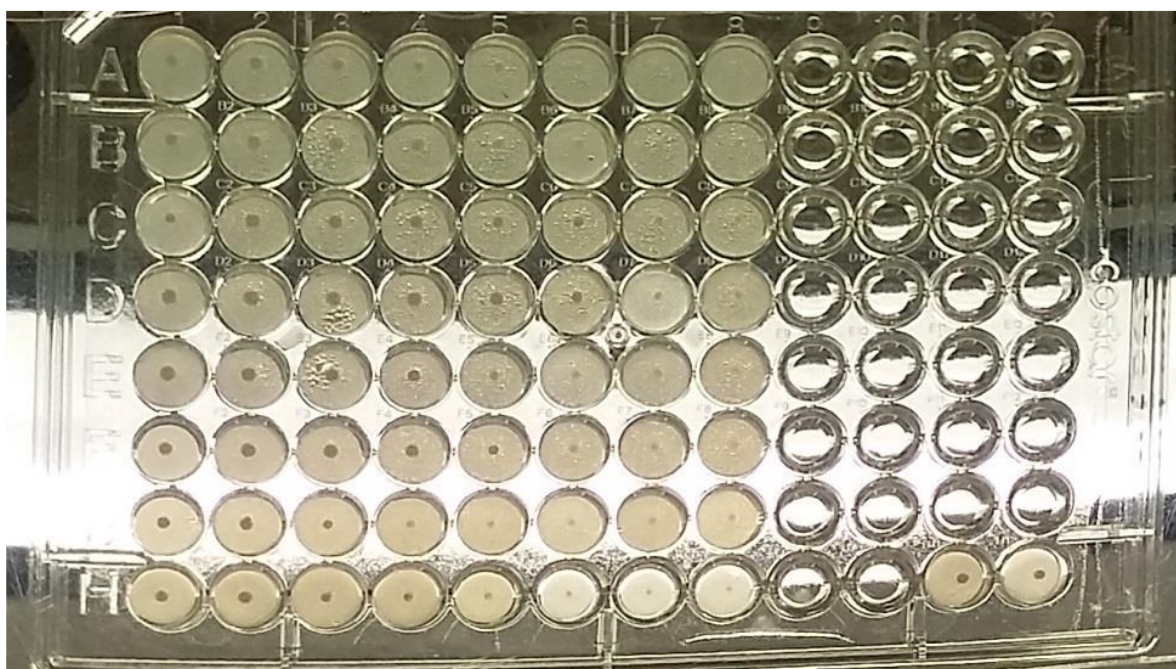

**Figure S1.** Microtiter plate ready to be read.

Supplement: s1 [file s1]
